# Supplementary material for: A 14-3-3 Protein-Encoding Gene, BdGF14g, Confers Better Drought Tolerance by Regulating ABA Biosynthesis and Signaling
Source: MDPI journal article supplement (doi:10.3390/plants12233975), 2023-11-26
Supplement: s1 [file s1]

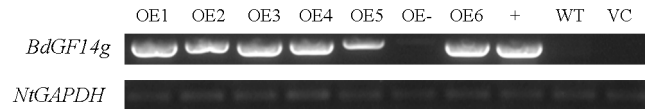

**Figure S1.** The relative expression levels of *BdGF14g* in transgenic tobaccos were detected. The *NtGAPDH* was taken as the internal reference.

**Table S1.** Primers for constructions of pBI121-*BdGF14g*, pGBKT7-*BdGF14g* and pGADT7-*NtABF2*

| Gene Name              | Forward/ Reverse primers(5'-3')                                                    |
|------------------------|------------------------------------------------------------------------------------|
| pBI121- <i>BdGF14g</i> | GCTCTAGAAATGTCGGCACCTGCGGAGCT<br>CGGGATCCCTGCCCATCACCAGAGTCA                       |
| <i>BdGF14g</i> -BD     | GGATCCCG ATGTCGGCACCTGCGGAGCT<br>AACTGCAGCTGCCCATCACCAGAGTCA                       |
| <i>NtABF2</i> -AD      | CCATGGAGGCCAGTGAATTCATGGGGAGTAATTTTAATT<br>CAGCTCGAGCTCGATGGATCCTTACCATGGACCAGTCTG |

**Table S2.** Primers for expressions of related marker genes

| Gene Name       | Forward/ Reverse primers(5'-3')                  |
|-----------------|--------------------------------------------------|
| <i>NtGAPDH</i>  | TGCCTTGAGCAAGAACTTTGTG<br>GGCAGATCAAATCAATCACACG |
| <i>NtERD10C</i> | AACGTGGAGGCTACAGATCG<br>GTTCTCTTGGGCATGAGTT      |
| <i>NtNCED1</i>  | AAGAATGGCTCCGCAAGTTA<br>GCCTAGCAATTCCAGAGTGG     |
| <i>NtABF2</i>   | GCAGCCATCTATCTATTC<br>GCAACTCATCCATATTCA         |
